# Supplementary material for: Risk factors for tuberculosis smear non-conversion in Eden district, Western Cape, South Africa, 2007–2013: a retrospective cohort study
Source: PubMed Central journal article supplement (PMC4971671; doi:10.1186/s12879-016-1712-y), 2016-08-02

## New TB cases

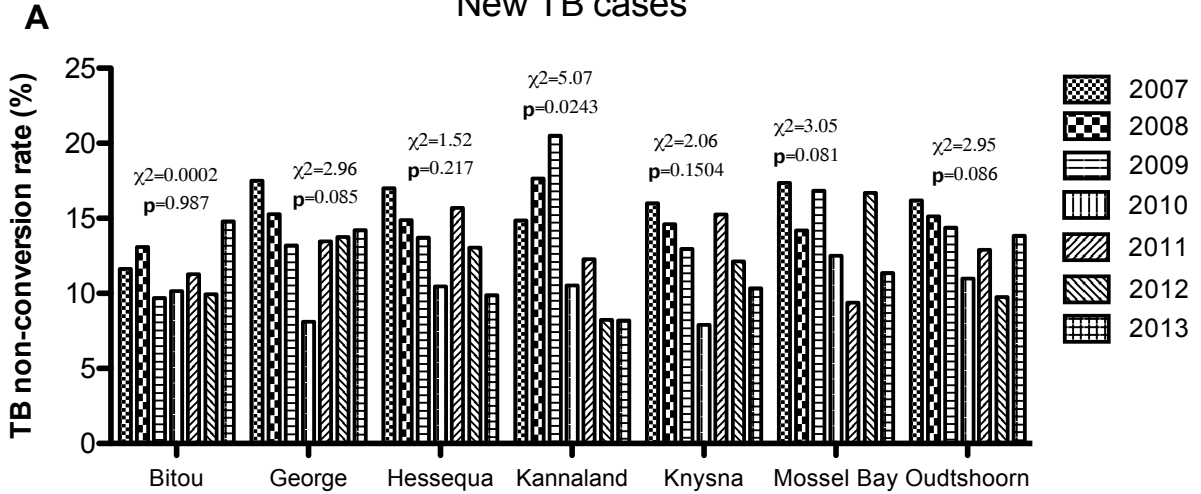

## Re-treatment TB cases

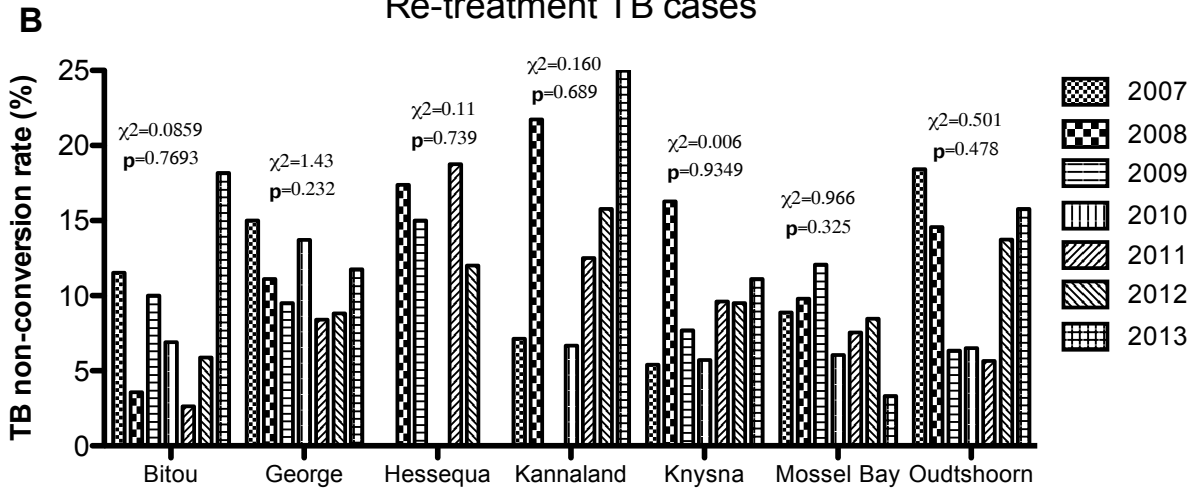

Supplement: 12879_2016_1712_MOESM1_ESM.pdf [file 12879_2016_1712_MOESM1_ESM.pdf]
